# Supplementary material for: Impact of Evidence‐Based Stroke Care on Patient Outcomes: A Multilevel Analysis of an International Study
Source: PubMed Central journal article supplement — J Am Heart Assoc. 2019 Jun 25;8(13):e012640. doi: 10.1161/JAHA.119.012640 (PMC6662356; doi:10.1161/jaha.119.012640), 2019-06-25
Supplement: JAH3-8-e012640-s001.pdf [file JAH3-8-e012640-s001.pdf]

# **SUPPLEMENTAL MATERIAL**

**Table S1. Distribution of the evidence-based interventions and model analysis results for ischemic stroke treatment based on mRS at 3 months including multiple imputation.**

| Evidence-based interventions                              | mRS 0-2<br>(N=5112) | mRS 3-6<br>(N=3271) | Total (N=8383) | Unadjusted       |         | Model 3+MI       |         |
|-----------------------------------------------------------|---------------------|---------------------|----------------|------------------|---------|------------------|---------|
|                                                           |                     |                     |                | OR (95%CI)       | P value | OR (95%CI)       | P value |
| Reperfusion therapy (n=3093)                              | 591 (34.2%)         | 460 (33.7%)         | 1051 (34.0%)   | 1.06 (0.91,1.25) | 0.454   | 1.37 (1.13,1.67) | 0.002   |
| ASU admission                                             | 2633 (51.5%)        | 2090 (63.9%)        | 4723 (56.3%)   | 0.77 (0.65,0.91) | 0.003   | 1.10 (0.88,1.38) | 0.396   |
| Antihypertensives                                         | 2771 (54.2%)        | 1954 (59.7%)        | 4725 (56.4%)   | 0.89 (0.81,0.98) | 0.023   | 1.08 (0.95,1.23) | 0.237   |
| Antiplatelet therapy                                      | 4975 (97.3%)        | 3088 (94.4%)        | 8063 (96.2%)   | 1.98 (1.56,2.50) | <0.001  | 1.49 (1.12,1.99) | 0.006   |
| Statin therapy                                            | 4390 (85.9%)        | 2570 (78.6%)        | 6960 (83.0%)   | 1.64 (1.45,1.87) | <0.001  | 1.22 (1.05,1.42) | 0.010   |
| Anticoagulation in AF (n=1203)                            | 259 (49.7%)         | 315 (46.2%)         | 574 (47.7%)    | 1.14 (0.89,1.45) | 0.293   |                  |         |
| Swallow assessment                                        | 3916 (76.6%)        | 2363 (72.2%)        | 6279 (74.9%)   | 1.47 (1.30,1.67) | <0.001  | 1.26 (1.08,1.46) | 0.002   |
| Physiotherapy in disabled patients (n=3073)               | 645 (72.5%)         | 1549 (71.0%)        | 2194 (71.4%)   | 1.20 (0.96,1.50) | 0.102   | 1.41 (1.06,1.88) | 0.018   |
| Optimal stroke care                                       | 770 (15.1%)         | 459 (14.0%)         | 1229 (14.7%)   | 1.45 (1.26,1.67) | <0.001  | 1.36 (1.15,1.61) | <0.001  |
| Optimal stroke care (without reperfusion/anticoagulation) | 1146 (22.4%)        | 795 (24.3%)         | 1941 (23.2%)   | 1.21 (1.07,1.37) | 0.002   | 1.25 (1.08,1.45) | 0.004   |

mRS: modified Rankin scale, MI: multiple imputation, ASU: acute stroke unit, AF: atrial fibrillation

**Table S2. Distribution of the evidence-based interventions and model analysis results for ischemic stroke treatment based on mortality at 3 months.**

| Evidence-based interventions                              | Alive (N=8619) | Dead (N=652) | Total (N=9271) | Unadjusted       |         | Model 1          |         | Model 2          |         | Model 3          |         |
|-----------------------------------------------------------|----------------|--------------|----------------|------------------|---------|------------------|---------|------------------|---------|------------------|---------|
|                                                           |                |              |                | OR (95%CI)       | P value |
| Reperfusion therapy (n=3509)                              | 1110 (34.9%)   | 98 (29.7%)   | 1208 (34.4%)   | 1.27 (0.98,1.64) | 0.069   | 1.05 (0.80,1.39) | 0.711   | 1.69 (1.24,2.31) | <0.001  | 1.72 (1.26,2.35) | <0.001  |
| ASU admission                                             | 4985 (57.8%)   | 469 (71.9%)  | 5454 (58.8%)   | 0.70 (0.53,0.93) | 0.013   | 1.40 (0.98,2.00) | 0.062   | 1.58 (1.11,2.25) | 0.011   | 1.69 (1.17,2.43) | 0.005   |
| Antihypertensive therapy                                  | 4891 (56.7%)   | 376 (57.7%)  | 5267 (56.8%)   | 1.15 (0.97,1.36) | 0.111   | 1.42 (1.18,1.70) | <0.001  | 1.38 (1.10,1.72) | 0.004   | 1.38 (1.11,1.72) | 0.004   |
| Antiplatelet therapy                                      | 8342 (96.8%)   | 586 (89.9%)  | 8928 (96.3%)   | 3.06 (2.27,4.12) | <0.001  | 3.13 (2.29,4.29) | <0.001  | 1.99 (1.37,2.88) | <0.001  | 1.98 (1.37,2.87) | <0.001  |
| Statin therapy                                            | 7255 (84.2%)   | 410 (62.9%)  | 7665 (82.7%)   | 3.17 (2.64,3.81) | <0.001  | 2.72 (2.24,3.30) | <0.001  | 2.11 (1.70,2.62) | <0.001  | 2.12 (1.70,2.64) | <0.001  |
| Anticoagulation in AF (n=1354) †                          | 560 (49.5%)    | 92 (41.3%)   | 652 (48.2%)    | 1.35 (1.00,1.83) | 0.053   | -                | -       | -                | <0.001  | -                | <0.001  |
| Swallow assessment                                        | 6582 (76.4%)   | 403 (61.8%)  | 6985 (75.3%)   | 2.39 (1.96,2.90) | <0.001  | 2.25 (1.84,2.74) | <0.001  | 1.92 (1.54,2.39) | <0.001  | 1.94 (1.55,2.42) | <0.001  |
| Physiotherapy in disabled patients (n=3443)               | 2145 (74.2%)   | 391 (70.7%)  | 2536 (73.7%)   | 1.52 (1.18,1.95) | 0.001   | 2.67 (1.98,3.60) | <0.001  | 2.29 (1.67,3.13) | <0.001  | 2.22 (1.60,3.07) | <0.001  |
| Optimal stroke care                                       | 1368 (15.9%)   | 59 (9.0%)    | 1427 (15.4%)   | 2.43 (1.83,3.23) | <0.001  | 2.45 (1.83,3.27) | <0.001  | 2.16 (1.57,2.97) | <0.001  | 2.23 (1.62,3.09) | <0.001  |
| Optimal stroke care (without reperfusion/anticoagulation) | 2137 (24.8%)   | 132 (20.2%)  | 2269 (24.5%)   | 1.83 (1.47,2.26) | <0.001  | 2.10 (1.68,2.62) | <0.001  | 1.88 (1.47,2.41) | <0.001  | 1.94 (1.51,2.49) | <0.001  |
| Optimal stroke care (only survivors >7 days) (n=9153)     | 1368 (15.9%)   | 54 (10.1%)   | 1422 (15.5%)   | 2.09 (1.55,2.82) | <0.001  | 2.13 (1.57,2.89) | <0.001  | 1.92 (1.38,2.67) | <0.001  | 1.95 (1.40,2.73) | <0.001  |

ASU: acute stroke unit, AF: atrial fibrillation

Un-adjusted: hierarchical mixed logistic regression model, the link function is logit with fixed period, fixed head position effect, random cluster, and random cluster-period effects.

Model 1: Adjusted for country, prestroke mRS score, age and sex.

Model 2: Further adjusted for baseline NIHSS score, and previous history of stroke, heart disease, or diabetes, history of hypertension, and time from stroke onset to intervention.

Model 3: Further adjusted for # of stroke patients admitted annually, multi-discipline team available, academic hospital, local special pathway or service organization for stroke care, endovascular therapies available for stroke patients.

†Results not shown because the models did not converge based on low numbers.

**Table S3. Evidence-based interventions for ischemic stroke treatment and optimal treatment stratified by region.**

| Evidence-based interventions       | Australia and UK | China and          | India and Sri    | South America | Total        | P value |
|------------------------------------|------------------|--------------------|------------------|---------------|--------------|---------|
|                                    | (N=3850)         | Taiwan<br>(N=4178) | Lanka<br>(N=658) |               |              |         |
| Reperfusion therapy                | 810 (37.7%)      | 215 (25.3%)        | 56 (29.9%)       | 142 (37.6%)   | 1223 (34.3%) | <0.001  |
| ASU admission                      | 3785 (98.3%)     | 855 (20.5%)        | 560 (85.1%)      | 336 (42.1%)   | 5536 (58.4%) | <0.001  |
| Antihypertensives therapy          | 2661 (69.1%)     | 1788 (42.8%)       | 383 (58.2%)      | 533 (66.7%)   | 5365 (56.6%) | <0.001  |
| Antiplatelet therapy               | 3681 (95.6%)     | 4041 (96.7%)       | 632 (96.0%)      | 777 (97.2%)   | 9131 (96.3%) | 0.026   |
| Statin therapy                     | 2908 (75.5%)     | 3621 (86.7%)       | 561 (85.3%)      | 750 (93.9%)   | 7840 (82.7%) | <0.001  |
| Anticoagulation in AF              | 457 (46.9%)      | 102 (37.4%)        | 28 (77.8%)       | 78 (84.8%)    | 665 (48.4%)  | <0.001  |
| Swallow assessment                 | 3226 (83.8%)     | 2865 (68.6%)       | 438 (66.6%)      | 607 (76.0%)   | 7136 (75.2%) | <0.001  |
| Physiotherapy in disabled patients | 1718 (94.9%)     | 346 (34.1%)        | 207 (63.1%)      | 314 (83.5%)   | 2585 (73.3%) | <0.001  |
| Optimal stroke care                | 1001 (26.0%)     | 171 (4.1%)         | 151 (22.9%)      | 122 (15.3%)   | 1445 (15.2%) | <0.001  |

ASU: acute stroke unit, AF: atrial fibrillation

P value from logistic regression model

**Table S4. Patient outcome by hospital characteristics: uni and multivariable logistic regression adjusted for patient characteristics.**

| Hospital characteristics                                         | Univariable analysis |                     |                   |                  |         | Multivariable analysis |                       |                     |                  |         |
|------------------------------------------------------------------|----------------------|---------------------|-------------------|------------------|---------|------------------------|-----------------------|---------------------|------------------|---------|
|                                                                  | mRS 0-2<br>(N=5112)  | mRS 3-6<br>(N=3271) | Total<br>(N=8383) | OR<br>(95%CI)    | P value | mRS 0-2<br>(N=4931) †  | mRS 3-6<br>(N=3068) † | Total<br>(N=7999) † | OR<br>(95%CI)    | P value |
| Number of stroke patients admitted annually                      |                      |                     |                   |                  |         |                        |                       |                     |                  |         |
| <500                                                             | 1133 (22.6%)         | 887 (27.5%)         | 2020 (24.5%)      |                  |         | 1100 (22.7%)           | 836 (27.6%)           | 1936 (24.6%)        |                  |         |
| [500,1000]                                                       | 1792 (35.7%)         | 1343 (41.6%)        | 3135 (38.0%)      | 1.10 (0.84,1.44) |         | 1718 (35.5%)           | 1269 (42.0%)          | 2987 (38.0%)        | 0.96 (0.74,1.24) |         |
| >1000                                                            | 2092 (41.7%)         | 995 (30.9%)         | 3087 (37.5%)      | 1.87 (1.41,2.47) | <0.001  | 2019 (41.7%)           | 920 (30.4%)           | 2939 (37.4%)        | 1.12 (0.84,1.50) | 0.421   |
| Academic hospital                                                | 4461 (88.9%)         | 2737 (84.6%)        | 7198 (87.2%)      | 1.36 (0.98,1.88) | 0.067   | 4321 (89.3%)           | 2563 (84.6%)          | 6884 (87.5%)        | 1.02 (0.77,1.36) | 0.882   |
| Local special pathway or service organisation for stroke care    | 4459 (88.8%)         | 2990 (92.5%)        | 7449 (90.2%)      | 0.76 (0.51,1.13) | 0.176   | 4290 (88.7%)           | 2795 (92.2%)          | 7085 (90.0%)        | 1.19 (0.85,1.65) | 0.316   |
| Local protocols for fever/blood glucose/swallow dysfunction      | 3828 (76.3%)         | 2355 (72.8%)        | 6183 (74.9%)      | 1.22 (0.93,1.61) | 0.149   | 3697 (76.4%)           | 2201 (72.6%)          | 5898 (74.9%)        | 1.04 (0.84,1.29) | 0.703   |
| Organized ED clinical pathway/checklist/protocols for evaluation | 4790 (95.4%)         | 3029 (93.7%)        | 7819 (94.7%)      | 1.46 (0.89,2.38) | 0.130   | 4621 (95.5%)           | 2853 (94.1%)          | 7474 (95.0%)        | 1.20 (0.78,1.83) | 0.404   |
| Availability of a local multidisciplinary team                   | 2675 (53.3%)         | 2114 (65.4%)        | 4789 (58.0%)      | 0.60 (0.48,0.76) | <0.001  | 2571 (53.1%)           | 1980 (65.3%)          | 4551 (57.8%)        | 0.80 (0.62,1.05) | 0.106   |
| Endovascular therapies available for stroke patients             | 2955 (59.3%)         | 1774 (55.5%)        | 4729 (57.8%)      | 1.22 (0.95,1.55) | 0.112   | 2869 (59.7%)           | 1671 (55.7%)          | 4540 (58.2%)        | 1.22 (0.95,1.55) | 0.270   |

†: Only patients with all non-missing covariates

mRS: modified Rankin Scale, ED: emergency department

Univariable analysis: hierarchical mixed logistic regression model, the link function is logit, with fixed period, fixed head position effect, random cluster, and random cluster-period effects.

Multivariable analysis: Adjusted for age, sex, previous history of stroke, heart disease, or diabetes, history of hypertension, prestroke mRS score, baseline NIHSS score, time from stroke onset to intervention and country.
